# Supplementary material for: Gain of function mutant p53 proteins cooperate with E2F4 to transcriptionally downregulate RAD17 and BRCA1 gene expression
Source: PubMed Central journal article supplement (PMC4467386; doi:10.18632/oncotarget.2587), 2015-02-05
Supplement: oncotarget-06-5547-s001.pdf [file oncotarget-06-5547-s001.pdf]

## SUPPLEMENTARY MATERIALS, FIGURES AND TABLE

### Cells

MCF7 (wtp53) cell lines were cultured in DMEM medium (Invitrogen, Invitrogen, Carlsbad, CA, USA) supplemented with 10% (v/v) FBS (Invitrogen, Invitrogen, Carlsbad, CA, USA).

### GST recombinant protein

Recombinant proteins employed in the DNA repair assay (Supplemental Figure 3D) were produced and purified as previously described (Strano *et al.*, 2000; Valenti *et al.*, 2011). Briefly, *Escherichia coli* cells (BL21-DE3) were transformed with the appropriate plasmid grown at 37°C in LB medium to an optical density (600 nm) of 0.4, and induced with 0.5 mM isopropyl-1-thio-galactopyranoside for 3 h at the same temperature. Cells were harvested by centrifugation and lysed in ice cold phosphate-buffered saline (PBS) containing 0.1% Triton X-100, 0.5% NP40, 1 mM dithiothreitol (DTT), protease inhibitors, by probe sonication. After centrifugation at 12,000 g, supernatant fractions were incubated with either glutathione-Sepharose beads (G 4510; Sigma-Aldrich, St. Louis, MO), for 1 h at 4°C under constant shaking. After washes in PBS, GST-fusions were eluted with either 100 mM Tris-HCl, pH 8, 250 mM NaCl containing 10 mM glutathione (G 4251; Sigma-Aldrich).

### Luciferase transactivation promoter assays

*BRCA1* promoter luciferase assays and the NHEJ Luciferase assays were performed as described previously [43].  $2 \times 10^5$  cells were plated into 12-well culture plates and transfected with 100 pmol of each siRNA and 100 ng of each reporter construct using Lipofectamine 2000 (Invitrogen, Carlsbad, CA, USA) according to the manufacturer's specifications. Firefly luciferase activity was measured using a Luciferase Reporter Assay System kit (Promega Corporation) according to the manufacturer's instructions. Luciferase activity was normalized to total protein and assayed in triplicate.

### Kaplan-Meier analysis

Gene expression dataset raw data and survival information of 478 BCL patients were downloaded from GEO (<http://www.ncbi.nlm.nih.gov/geo/>) and the Kaplan-Meier analysis was performed by using the on-line tool [www.kmplot.com](http://www.kmplot.com) [53], where eight public datasets were considered. Gene expression profiles were performed by using Affymetrix HG-U133A (GPL96) and HG-U133 Plus 2.0 (GPL570) microarrays were only considered. The latter are the most frequently used and have 22, 277 probe sets in common. To analyze the prognostic value of genes, the cohorts were divided into two groups according to the median (or upper/lower quartile) expression of the gene. The two groups were compared in terms of relapse free survival (RFS). A survival curve was displayed, and the hazard ratio with 95% confidence intervals and logrank *P* value are calculated. *P* values < 0.05 were considered statistically significant.

### Supporting information table S1

Primer sequences for amplification of cDNAs in Real Time PCR experiments.

### Supporting information table S2

Primers used for the amplification of the different regulatory regions of *BRCA1* and *RAD17* promoters. Oligonucleotides for the *Negative Region* amplifying a fragment encompassing 68509119-68509420 bp sequence of cyclin B1 gene were designed on a sequence of human cyclinB1 gene where mut p53 was not recruited as previously demonstrated (Di Agostino *et al.*, 2006, Figure S3 Supplemental Data).

### Supporting information table S3

Mutational status of *TP53* gene of HNSCC tumors used for RT-qPCR expression profiles.

### Supporting information table S4

Fisher's exact test was used to examine the significance of the association between clinical variables and status of p53 mutation. Fold <1 means down-regulation and fold >1 means up-regulation.

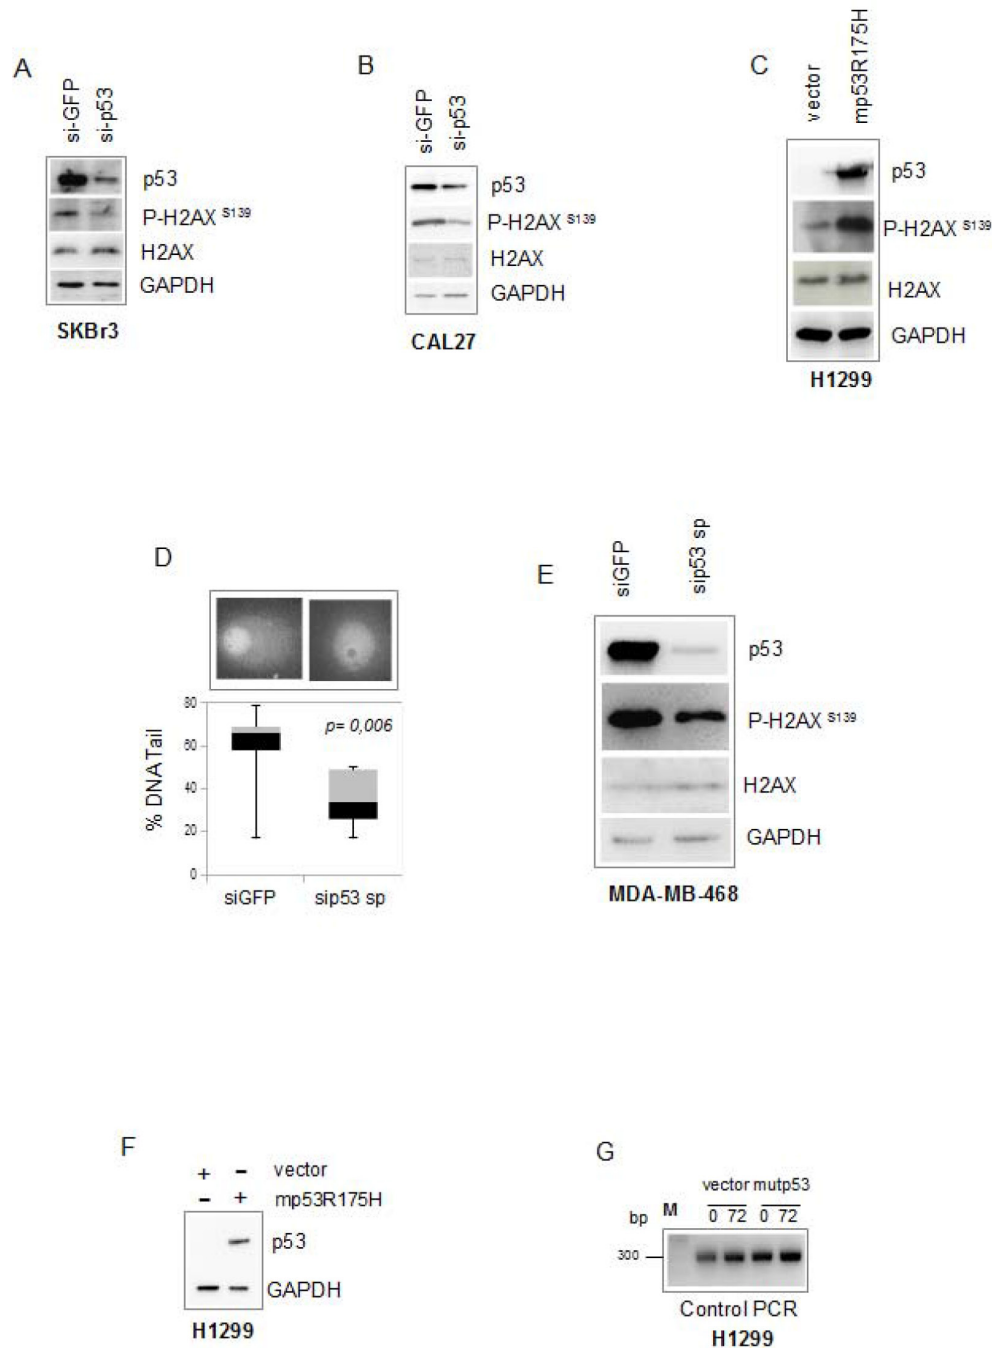

**Supplementary Figure S1:** (A-C) Western blot analysis was performed from 30  $\mu$ g of whole protein lysates of SKBr3 (a) and CAL27 (b) cells knocked-down for p53 with si-p53 and with si-GFP oligonucleotides as control, and in H1299 cells transfected with pcDNA3-p53R175H vector and empty pcDNA3 as control (c). The probing was carried out with the indicated antibodies. A pool from these cells was employed in the comet assays described in the Figures 1A-C. (D) MDA-MB-468 cells transfected with siGFP and with sip53 sp siRNAs (siRNA smart pool of three oligonucleotides by Santa Cruz Biotech.) were analyzed for amount of DNA damaged by comet assay. Representative pictures are shown in the upper panel. It was used a software tool to provide an automated analysis of comet assay images (OpenCOMET; www.opencomet.org). The extent of DNA damage is related to the amount of DNA in the tail. The percentage of DNA in the tail is plotted in the lower panels of each figures. About 100 cells were evaluated for each sample. *P*-values were calculated with two-tailed t-test. Statistically significant results were with *p*-value < 0.05. (E) Western blot analysis was performed in MDA-MB-468 cell line knocked-down for p53 with si-p53 sp and with si-GFP as control. The probing was carried out with the indicated antibodies. (F and G) Protein extracts from H1299 cell line (f) transfected with pcDNA3-p53R175H vector and empty pcDNA3 as control were analyzed for p53 protein expression by western blotting. The genomic DNA (g) extracted from an aliquot of these cells was tested in control PCRs using the oligonucleotides that amplify 280 bp on genomic DNA described in "Primers used in PCR of ChIP experiments" as "negative region" in the Supplementary Table 2. These genomic preparations were used as template in the RAPD-PCR analysis described in Figure 1D.

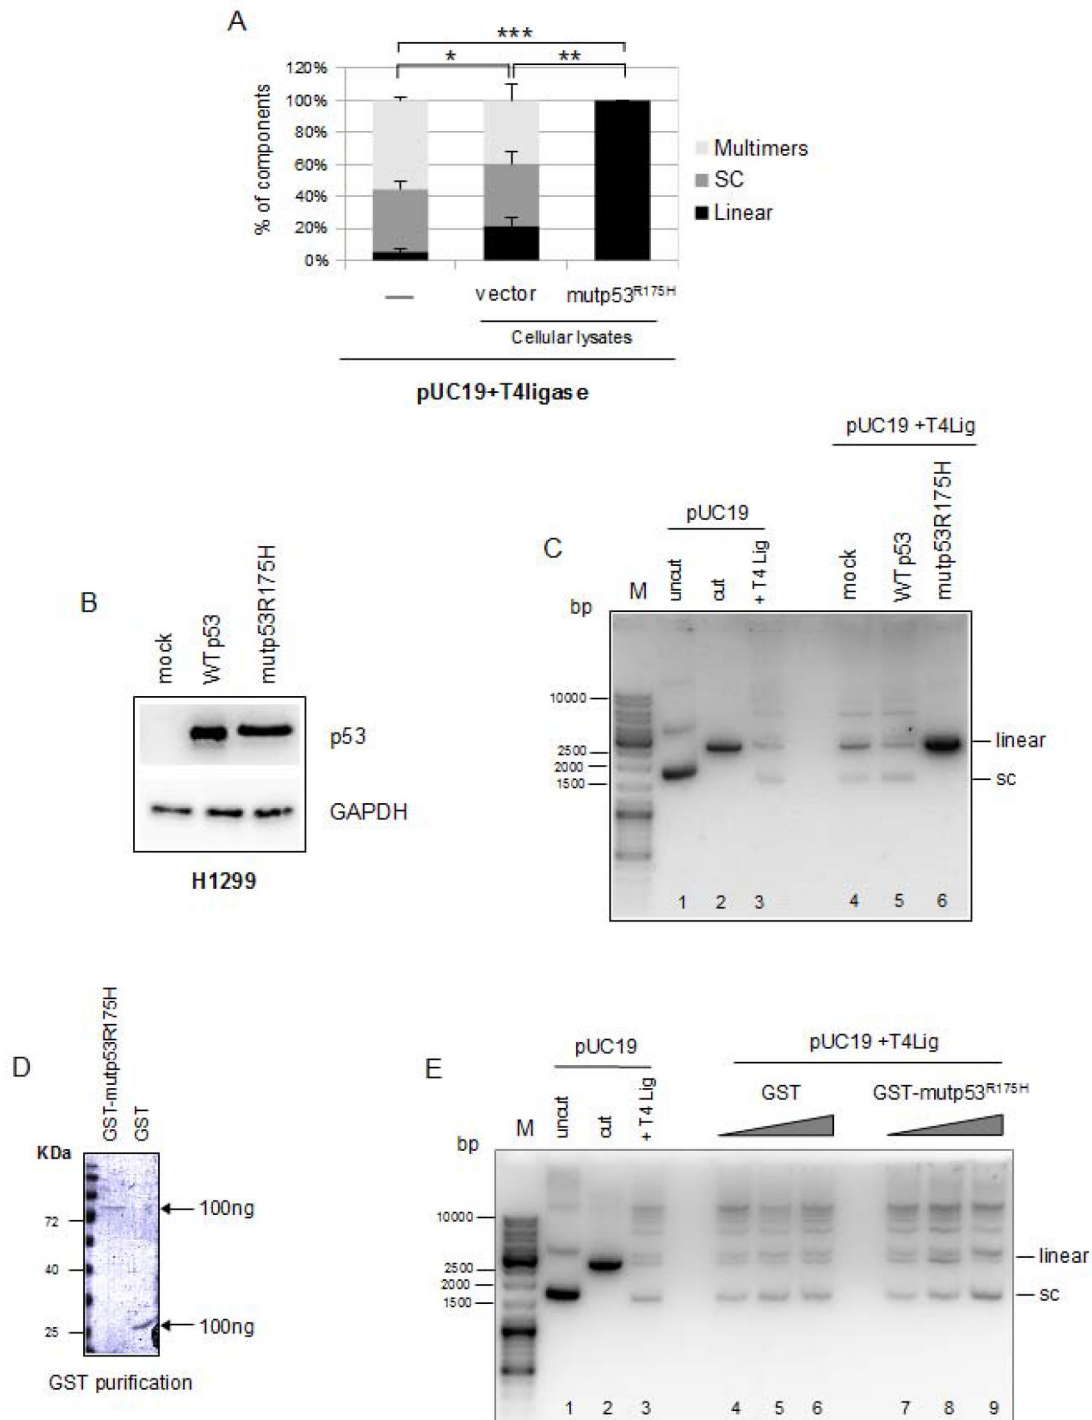

**Supplementary Figure S2:** (A) Densitometric analysis (Image J software; <http://imagej.nih.gov/ij/>) from all the experiments of T4 ligase DNA repair assay from H1299 cells transiently transfected with pCDNA3-vector and pCDNA3-mutp53R175H presented in the manuscript (and others not shown). The cellular lysates provoked a different pattern of bands than the sample with only T4 ligase and cut vector. Linear (linearized pUC19 vector), SC (supercoiled-coil re-ligated vector), Multimers (re-ligated vector in different ways). The *p*-values are referring only to the linear component in black columns (\* = 0,007; \*\* =  $3 \times 10^{-6}$ ; \*\*\* =  $2 \times 10^{-8}$ ; *n* = 6). (B) Protein extracts from H1299 cell line transfected with pcDNA3-wild-type p53, pcDNA3-p53R175H vectors and empty pcDNA3 as control were analyzed for p53 protein expression by western blotting. (C) Comparison of ligation products of 5'-cohesive-ended linear DNA (lane 2) in the presence of T4 DNA ligase alone (lane 3) or following pre-incubation with whole protein extracts of H1299 cells transfected with wild type p53 (lane 5), mutp53R175H (lane 6) or control expressing vectors (lane 4). Numbers indicate the lanes. (D) 100ng of GST-mutp53R175H and GST alone purified by glutathione-Sepharose beads have run on 10% acrylamide gel. (E) Comparison of ligation products of 5'-cohesive-ended linear DNA (lane 2) in the presence of T4 DNA ligase alone (lane 3) or following incubation with increasing amount of GST (100, 200 and 500ng; lanes 4, 5 and 6 respectively) or GST-mutp53R175H (100, 200 and 500ng; lanes 7, 8 and 9 respectively) proteins. Numbers indicate the lanes.

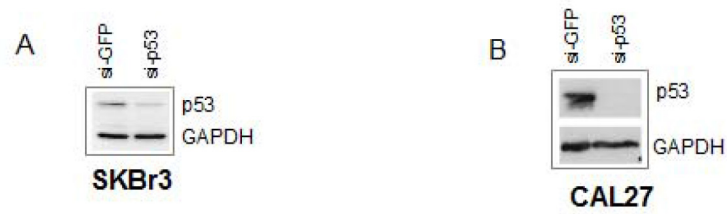

**Supplementary Figure S3: (A and B)** Western blot analysis was performed from 30  $\mu$ g of whole protein lysates of SKBr3 (a) and CAL27 (b) cells knocked-down for p53 with si-p53 and with si-GFP oligonucleotides as control. A fraction of these lysates were used in the DNA repair assays described in the Figures 1D and E, respectively.

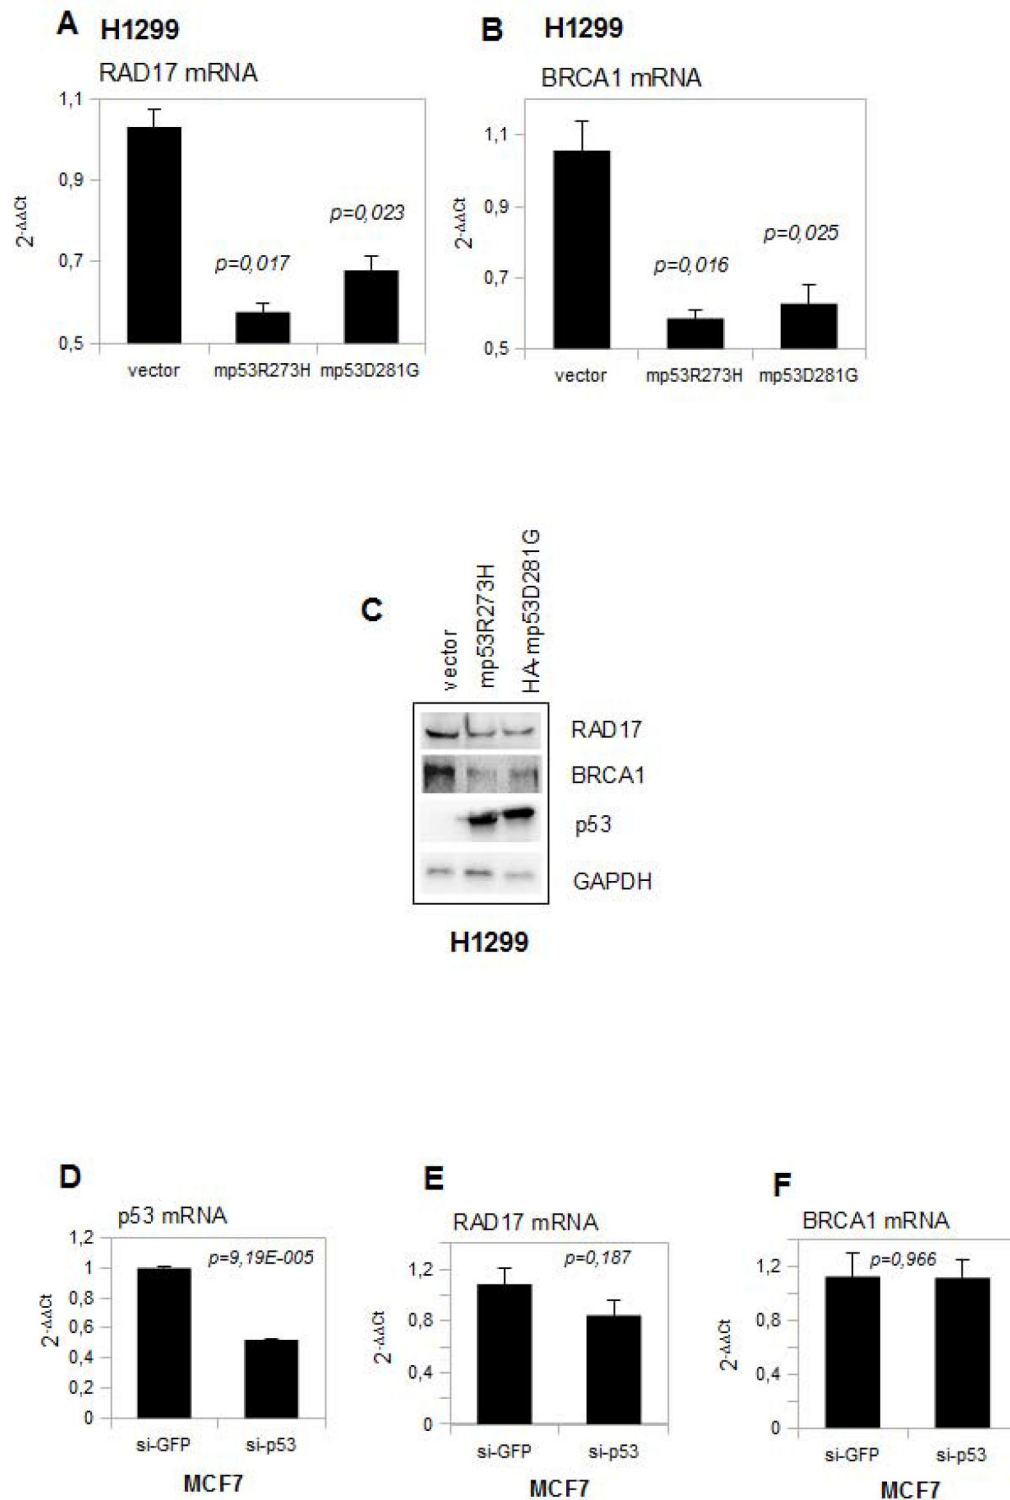

**Supplementary Figure S4:** (A and B) H1299 cells were transfected with 2  $\mu$ g of pcDNA3-p53R273H and pcDNA3HA-p53D281G and from the cDNA obtained by these cells was performed a RT-qPCR to evaluate the RAD17 (a) and BRCA1 (b) mRNAs expression. (C) Western blot analysis was performed in H1299 cell line transfected as previously described. The probing was carried out with the indicated antibodies. (D-F) RT-qPCR analysis of *p53*, *RAD17* and *BRCA1* expression, respectively, in breast MCF7 cell line transfected with si-GFP and si-p53 siRNAs. The experiments were produced in biological triplicates. *P*-values of the shown qRT-PCR experiments were calculated with two-tailed t-test. Statistically significant results were with *p*-value < 0.05.

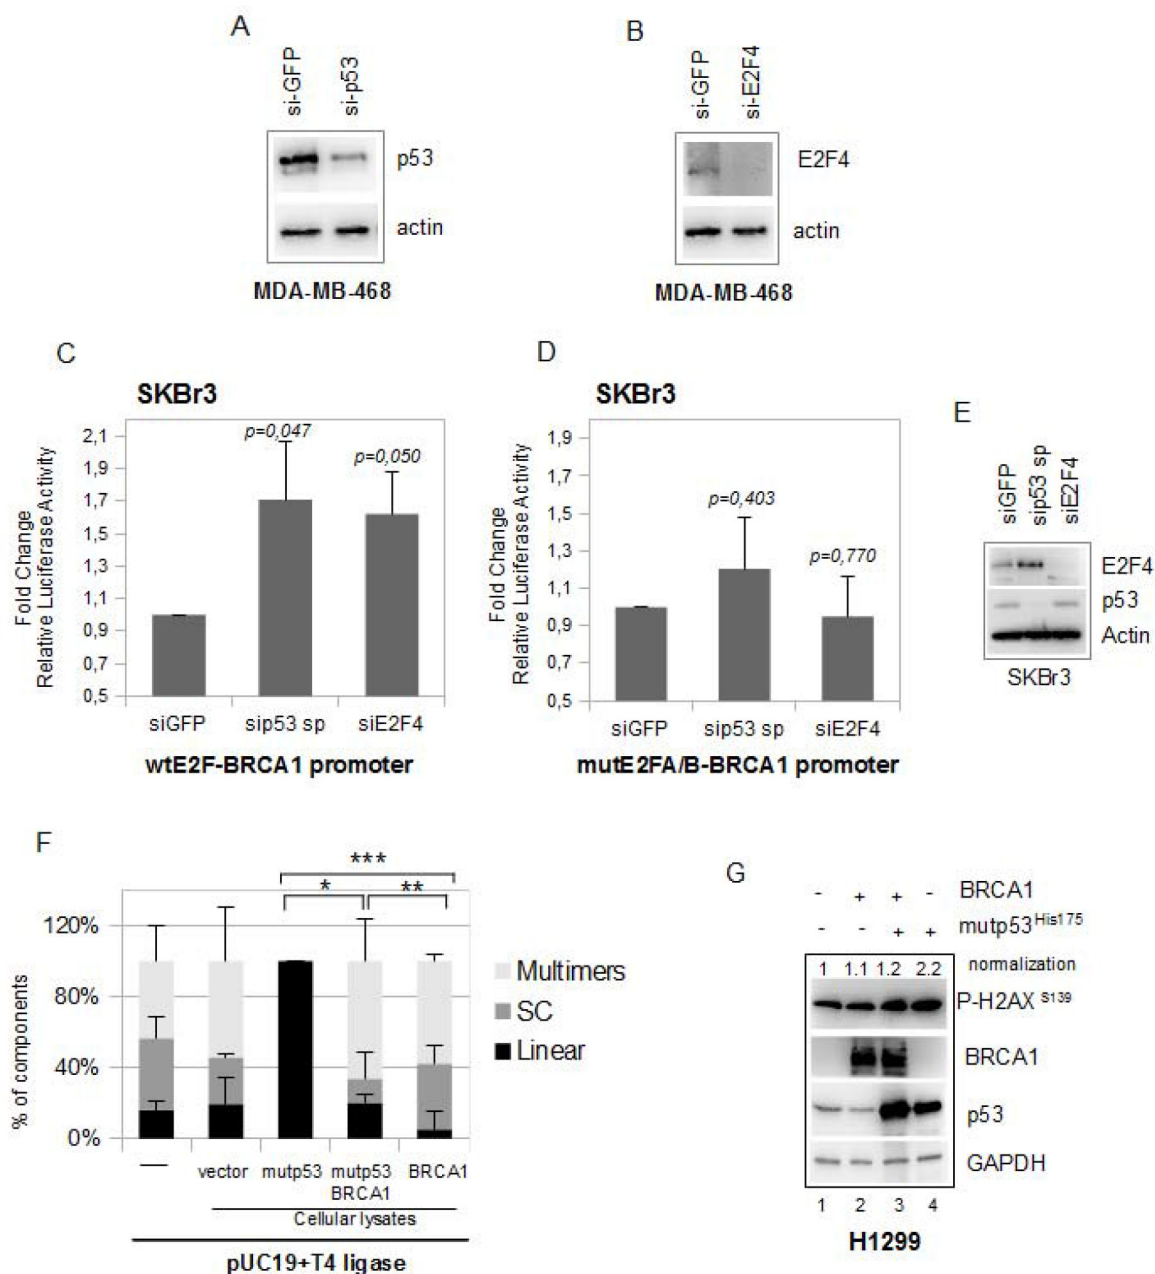

**Supplementary Figure S5:** (A and B) Western Blot analysis for the expression of the indicated gene products from MDA-MB-468 cells respectively transfected with si-p53 (a), si-E2F4 (b) and si-GFP as control. The cross-linked chromatin from these cells were used in the ChIP and Re-ChIP analysis described in the Figures 3 and 4. (C and D) SKBr3 cells interfered with siGFP, sip53 sp and siE2F4 oligos for 18 h (over night), were further transfected with wtE2F-BRCA1 (c) and mutE2FA/B-BRCA1 (d) and Firefly luciferase gene reporter constructs (100 ng). 24 hours after the second transfection the cells were harvested for the evaluation of luciferase activity. The shown data represent the mean +SD of triplicate determinations from three independent experiments. The histograms represented the folds over the siGFP control. (E) SKBR3 cells transfected with siGFP, sip53 sp and siE2F4 oligos used in the transactivation LUC assays showed in (c) and (d) were analyzed by western blotting at the end of the experiments. (F) Densitometric analysis (ImageJ software; <http://imagej.nih.gov/ij/>) from three experiments of T4 ligase DNA repair assay from H1299 cells transiently transfected with pCDNA3-vector and pCDNA3-mutp53R175H and BRCA1 in different combination as described in Figure 6A of the paper. The cellular lysates provoked a different pattern of bands than the sample with only T4 ligase and cut vector. Linear (linearized pUC19 vector), SC (supercoiled-coil re-ligated vector), Multimers (re-ligated vector in different ways). The *p*-values are referring only to the linear component in black columns (\* =  $10^{-5}$ ; \*\* = 0,008; \*\*\* =  $10^{-7}$ ; *n* = 3). (G) 50  $\mu$ g of protein extract from H1299 cell line transfected as described in (f) was analyzed by western blotting with the indicated antibodies.

(Continued)

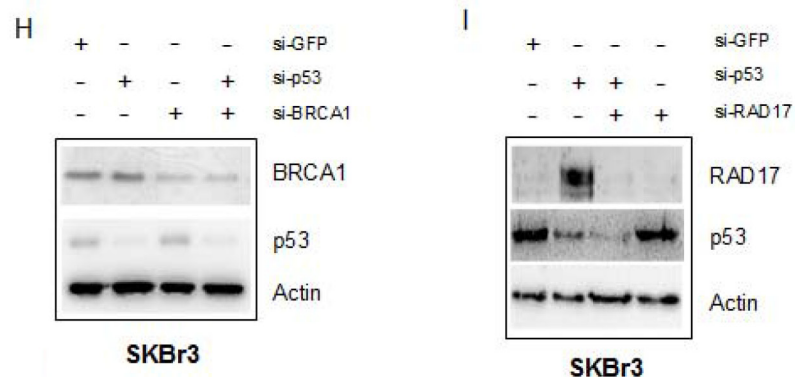

**Supplementary Figure S5 (Continued):** (H and I) SKBr3 cells were transiently transfected with ApaI-linearized vector, to perform the luciferase assay shown in Figures 6D and E, and with either siBRCA1 (h) and siRAD17 (i) oligos. After 48 h the cells were harvested and the functional changes in NHEJ were assessed measuring the Firefly Luciferase activity. 20 µg of protein extract from these cells were analyzed by western blotting with the indicated antibodies.

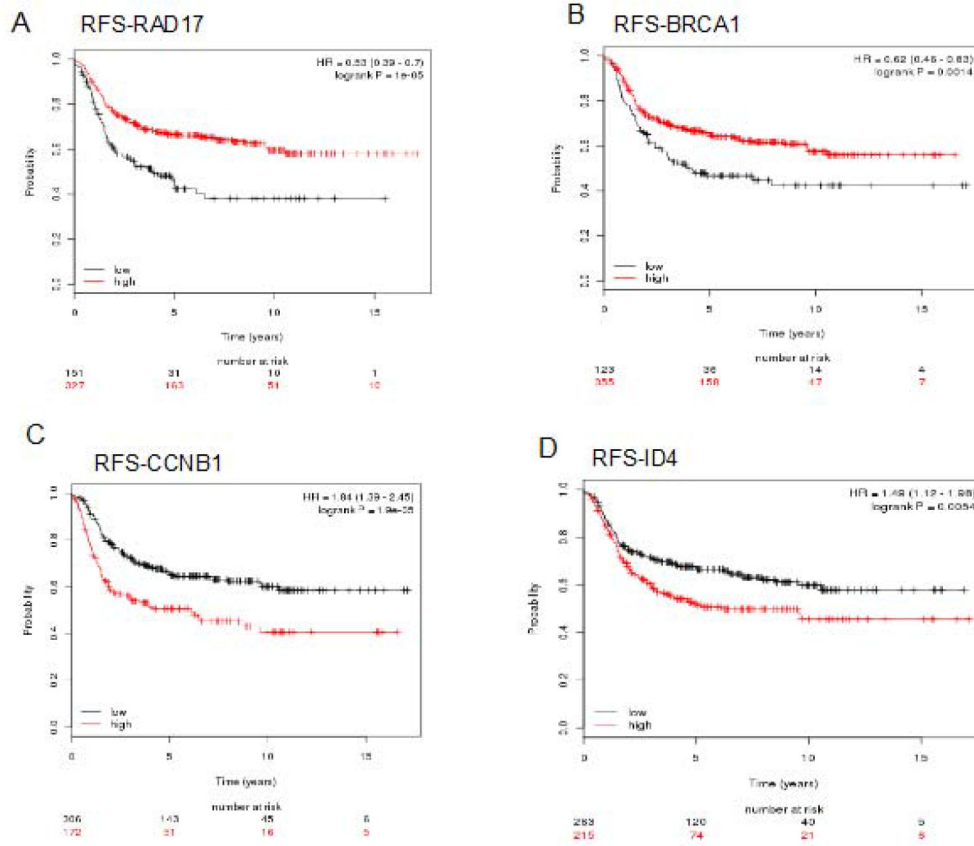

Gyorffy et al., 2010  
*Breast Cancer: basal-like molecular subtype*

**Supplementary Figure S6:** (A-C) Kaplan-Meier survival curves of relapse free survival (RFS) of BCL breast cancer patients classified according to the expression of RAD17 (a), BRCA1 (b), CNNB1 (c) and ID4 (D) mutp53-target genes. Statistically significant results with  $p$ -value  $< 0.05$ ,  $N = 478$ ). The two compared groups are the patients with the highest expression (red) levels of each gene versus the patients with the lowest expression (black).



**Supplementary Table S1. Primers used for qRT-PCR experiments**

|                                        |                                 |
|----------------------------------------|---------------------------------|
| <b>Rad17_a FW</b>                      | 5'- GGAGCATGGTATTCAAGTACAAG -3' |
| <b>Rad17_a RV</b>                      | 5'- GGGAAACATATGGAAGCTTGA -3'   |
| <b>Rad17_b FW</b>                      | 5'- TGAGAGCCAGTGAATTTCTGAG -3'  |
| <b>Rad17_b RV</b>                      | 5'- TGCATCACACCTCTCGTAGC -3'    |
| <b>BRCA1 FW (Mullany et al., 2012)</b> | 5'- TCCCATCTGTCTGGAGTTGA -3'    |
| <b>BRCA1 RV (Mullany et al., 2012)</b> | 5'- TGTGAAGGCCCTTTCTTCTG -3'    |
| <b>CHK1 FW</b>                         | 5'- TTCTATGGTCACAGGAGAGAAGG -3' |
| <b>CHK1 RV</b>                         | 5'- ATAAACCACCCCTGCCATGA -3'    |
| <b>CCNB1 FW</b>                        | 5'- GTTCCTACGGCCCCTGCT -3'      |
| <b>CCNB1 RV</b>                        | 5'- ATttTGGCCTGCAGTTGTTC -3'    |
| <b>GAPDH FW</b>                        | 5'- GAGTCAACGGATTTGGTCGT -3'    |
| <b>GAPDH RV</b>                        | 5'- GAGTCAACGGATTTGGTCGT -3'    |
| <b>β-Actin FW</b>                      | 5'- GAGGCCCCAGAGCAAGAGAG -3'    |
| <b>β-Actin RV</b>                      | 5'- AGGTGTGGTGCCAGATTTTC -3'    |

**Supplementary Table S2. Primers used in PCR of ChIP experiments: BRCA1 promoter**

| <b>BRCA1 promoter</b>  |                                 |
|------------------------|---------------------------------|
| E2F4_Reg1 FW           | 5'- CTAACATGGCGGACAAAGACA -3'   |
| E2F4_Reg1 RV           | 5'- CAATGGGGTGGTCGTTTT -3'      |
| E2F4_Reg2 FW           | 5'- TTCTGAGAGGCTGCTGCTTA -3'    |
| E2F4_Reg2 RV           | 5'- CCCGTCCAGGAAGTCTCAG -3'     |
| <b>RAD17 promoter</b>  |                                 |
| E2F4_Reg1 FW           | 5'- CAGGAGAATCCCTTGAACCA -3'    |
| E2F4_Reg1 RV           | 5'- TGATTTCGAGGTGGCTAATTTTT -3' |
| E2F4_Reg2 FW           | 5'- CTACCGGGAAGCAGATATGG -3'    |
| E2F4_Reg2 RV           | 5'- GCTTGGCAACCTGCTTAGTC -3'    |
| <b>Negative Region</b> |                                 |
| Negative_Reg FW        | 5'- AAGTATGCCACATCGAAGCA-3'     |
| Negative_Reg RV        | 5'-AAGGGGCCACAAGCTTTATT-3'      |

**Supplemental Table 3.**

| Patient number | Codon                           | Type of mutation |
|----------------|---------------------------------|------------------|
| '5'            | H193Y                           | missense         |
| '18'           | V157I, R158H                    | missense         |
| '69'           | N247in frame                    | frameshift       |
| '84'           | F106 in frame                   | frameshift       |
| '105'          | H179R                           | missense         |
| '93'           | del. 4 bp introne 8             | frameshift       |
| '3'            | wt                              |                  |
| '87'           | wt                              |                  |
| '90'           | wt                              |                  |
| '15'           | wt                              |                  |
| '45'           | del. 3 bp exon 9                | frameshift       |
| '12'           | wt                              |                  |
| '115'          | wt                              |                  |
| '109'          | C275R                           | missense         |
| '97'           | wt                              |                  |
| '120'          | wt                              |                  |
| '71'           | wt                              |                  |
| '101'          | R213X                           | nonsense         |
| '86'           | I255F                           | missense         |
| '104'          | H179R                           | missense         |
| '99'           | E198X                           | nonsense         |
| '28'           | P278T                           | missense         |
| '29'           | R156H;C275S;R282Q               | missense         |
| '49'           | E198X                           | nonsense         |
| '17'           | R196X                           | nonsense         |
| '61'           | V157T                           | missense         |
| '82'           | del 2 bp P152-E153 not in frame | frameshift       |
| '70'           | S183X                           | nonsense         |
| '74'           | splice site exon 9              | splice site      |
| '42'           | wt                              |                  |
| '8'            | wt                              |                  |
| '7'            | G266R                           | missense         |
| '66'           | del 1 bp exon 4 not in frame    | frameshift       |
| '113'          | R196X                           | nonsense         |
| '63'           | P273C                           | missense         |
| '88'           | del 1 bp exon 8                 | frameshift       |
| '54'           | wt                              |                  |

(Continued)

| Patient number | Codon                 | Type of mutation |
|----------------|-----------------------|------------------|
| '48'           | wt                    |                  |
| '14'           | P278S                 | missense         |
| '37'           | W146X                 | nonsense         |
| '22'           | R248Q                 | missense         |
| '59'           | H193R                 | missense         |
| '58'           | ins 1 bp not in frame | frameshift       |
| '51'           | Y234C                 | missense         |
| '55'           | Y205C                 | missense         |
| '36'           | wt                    |                  |
| '107'          | wt                    |                  |
| '57'           | wt                    |                  |
| '102'          | wt                    |                  |
| '10'           | wt                    |                  |
| '1'            | wt                    |                  |
| '2'            | wt                    |                  |
| '40'           | wt                    |                  |
| '44'           | wt                    |                  |
| '41'           | wt                    |                  |
| '112'          | wt                    |                  |
| '73'           | wt                    |                  |
| '32'           | wt                    |                  |
| '65'           | wt                    |                  |
| '60'           | wt                    |                  |
| '114'          | wt                    |                  |
| '67'           | wt                    |                  |
| '33'           | wt                    |                  |

**Supplemental Table S4.**

|                                  | <b>WT p53</b>   | <b>MUT p53</b>  | <b>Fisher's exact test</b> |
|----------------------------------|-----------------|-----------------|----------------------------|
| <b>Total patients</b>            | <b>#<br/>31</b> | <b>#<br/>32</b> | <b>pval<br/>-</b>          |
| Treated\untreated\unknown        | 15\15\1         | 24\8            | 0.07                       |
| G1G2\G3\unknown                  | 38\23           | 16\14\2         | 0.19                       |
| N+\N0\unknown                    | 10\20\1         | 17\14\1         | 0.12                       |
| T1T2\T3T4\unknown                | 20\11           | 12\19\1         | 0.074                      |
| Tobacco Yes\No                   | 10\21           | 5\27            | 0.15                       |
| Alcohol Yes\No                   | 18\13           | 11\23           | 0.08                       |
| Oral cavity\larynx pharynx       | 19\12           | 18\14           | 0.8                        |
| Fold RAD17 < 1\Fold<br>RAD17 > 1 | 14\30           | 17\2            | 0,0001                     |
| Fold BRCA1 < 1\Fold<br>BRCA1 > 1 | 11\24           | 20\8            | 0,002                      |

## SUPPLEMENTARY FILE 1

### 4000 bp upstream of First Exon of hBRCA1 promoter (Downloaded by Genome Browser-UCSC)

>hg19\_knownGene\_uc010whn.2 range =  
chr17:41196312-41281500 5'pad = 0 3'pad = 0  
strand = - repeatMasking = none

#### EXONS in UPPER cases

#### Introns, 3'UTR and 5'UTR in lower cases

Highlighted in yellow E2F4 consensus binding sequences identified by us using MATInspector. *MatInspector* is Genomatix' internationally renowned program for the identification of transcription factor binding sites (www.genomatix.de).

In red, E2F4 consensus sequences, E2FA(+) and E2FB(+) respectively, described in the paper of Bindra et al. 2005 Cancer Res. Figure 2A

gctggaccatattccaggctcctaagaactctcttggctggcatgta  
aaaaattcttccagcaagagcattaatctgaacgtgtgtaaacacgaa  
agctatggttaacctacgtctccttaggtctacagccagtagagtcag  
atagctgggtcttagcctcagcttccataattgacattattgtaagt  
ccatgtgactgactcactgtcttggcacaagttagcttttccctcaca  
tcgatttttttcttccagctcaacaaaaccccttaataaacaac  
ctggcaaccgaacttgggttactgtctccaccagaggcctgtacaagc  
aagtatccaagctgaggccgggagtggtgctcctgtaatcccag  
cactttgggagggcaaggcaggaggtatcgttagctcaggagttcaaga  
ccagctgggctggtcttggagaagcagacttctcgaaaaaaaaa  
aaaaaagtgtgacctgaaagtgtggtttgacaaaaaggagaacagtg  
cctttcaaaacaaaggtcccaacaaagatctttaaaccggggtctcg  
aaaaaaggagaatgggatgagaaggatataatgggtagtgctattttaa  
cttgcaagattcatctagcttccagttatcttccctagcactccatg  
ttccaagatagtgaccacccaaggactctctcattttcttggcc  
tgggccccttctactgaggagctgtggccttccatcagtagaagccgg  
atgttctgtgtccgaaattggtgggtcttggctcactgactcaaga  
atgaaattgaggaccctcacggtgagtggtacagttctaaagatgatg  
gtccagagttgttctctctgatgctggagctgtcagagttactcct  
tctgtggtgattcgtggtctcgtctcagagtgtaagctgcagacttt  
gcggtgagtggtacagctcctaaggcggcatgctctggagttgtctgt  
cctcccgtctggagttgctcattctcctggtgggtctggtctcgtg  
gcttcagagtgaaagctgcagacctctcggctggtgtaccagcagata  
aatgctatggcggaccaaagagtgagcagcagcaagatttattgcaaa  
gcacaagaacaaagctccacagcgtggaaggagaccagagcgggtgct  
gctgctggtcaggcagcctgcaatttttttttttttttttttttt  
gagatggagcttccctctgtcaccaggctggaatgagctggtgcaatct  
gggtcactgcaagctccgctcccgggttcacgcccattctcctgcctca  
acctcccagtagaggggattacaggcaccaccaccgaccagccta  
atfttcttttagtagagctggggttccactgtgttagccagatggt

ctcgatctctgacctgctgatccaccctctaggcctcccaattgctg  
ggattacaggtgtgagccactggcaccagcggggcagcctgcttttatt  
cccttatctgacccaccacatcctgttgattggtccattttacagaga  
gctaattggtccgtttgacaggggtgctgattggtgcaattacaatccct  
gagctagatatacacagagtgctgattggtgcaattacaatcctctagct  
agacataaaaattctccaagtcccactacattgcttagacacagagcac  
tgattggtgctttacaacctttagcttagacacagagtgctgattggtg  
catttgcacacctgagcttagacacagagcactgattggtgcaattaca  
tcttttagcttagacacagaagttctccaagtgccaccagattagctaga  
tacagagtgctgattggtgcatccccaaacccaagcttagacacagagtg  
ctgactggtgcatataaaatcctcaggctagacataaaagtttccaagt  
ccccatctgactcaggagcccagctggctcacttagtgatctctcgca  
gggctgtgcccggcgctcactctctcagcccttggcgctgatggg  
accgggctgtaggagcagggggcggtgcccgtcggggaggctcaggcca  
cgctggagctcacaggggtgggaggggctcgggcatggcgggctcag  
gtctgagccttgcctgtgacggggcggtggggcccgggtgagaattcaa  
ggggggtgagcggggcggtgctgctggggaccggcgccacctctgc  
agctgtgcccgggtgctagcccctgactgcccggggcgggggtgctg  
ggggcccgtgagcccgcgccacctggaactgcgctggtgctgagcgc  
tgcgcgagcccagttcccacaccgctctcctccacttccccgc  
aagcagagggagcggctctgcttccgcccagcccagagaggggccccca  
cagcgcagtggtgggctgaagggtctctccagcagggccagaatggacgc  
caaggccgaggagggcgccgagagcagcaggggctgtagcagctgtgca  
cctcgcatttgaaccacagacttccaactctccggcgttttccccca  
ctcggctcctcagaacagaaaggctctctcactctgactaaaacgat  
tagctgtccggagacacgaaaaagctgcccctcttcttgcaggattcc  
tcccttgaacttccaaaacctcttagtgtagctgaccccacccttag  
ctaaccagctgcttcttaccagcttcccggcccctggggagggcgga  
atgcaaaagaccgtccgctgcccagctctgcccctatctgtggggtgaa  
**ctaacatggcggaacagacagta**aactagtc**ccgttctccgctttc**g

#### E2F4 Reg1 (ChIP)

ccaagaagattggctcttaccactgtccctcaaacgaccacccattg  
actggtggcattgctgacggagacggggcaaaagcaagctgaaccg  
aaaaataacaaactggggctgaggggtggaactacagtgccagaca  
tggggcagagcgcatttcccctgcccaggcaattcggcgctactgctg  
tccccgagggcactgacttacaagactactgcccagactcctggggc  
tggatgggaattgtagtctcctaaagagttgactgatcttttaagg  
cctagtttctgcttcaaaatacgaatacactccagctccataact  
gttgacaagtacaagcgcgacaggtctccaatctatccactgatttcc  
gtgagaattgtcccctctgtgattggtgctctcctcataagactac  
agtttctaaggaaactgtggcgaagaccttccatccgcaacgcatgct  
ggaataaatttccctccaccccccaacaatccttacttattatftt  
accgaaactggagactccattaggggcggaaagagtgggggattgggac  
ctcttctacgactgcttggacaataggtagcgattctgactctgac  
agcaactactgtgatgcaataagccgcaactggaagagtagaggctagggg  
aggcactttatgcaaaactcaggtagaattctcctctccgctctt  
cctttacgctatccggggcagactgggtggccaatccagagccccg  
agagacgctggtcttctgtcctcccactcctgattgacttctgatt  
cgtattctgagaggctgctgtagcggtagcccctg**gtttccg**g**gg**

#### E2F4 reg2 (ChIP)

**caacgggaaagcgcgggaattacagata**aaftaaaactgcgactgcggc  
cgtgagctcgtgagacttctggacgggggacagggctgtggggttctc  
gtaagaatgatataccaaaaggtatataaatttgtaatgatgctaggt

ggaagcaaccacagtaggaaaaagtagaattattfaataacatagcgtt  
cctataaacattcatcagaaaaattataaaagagtttttagcacacagt  
aaattattccaaagtattttctgaagtttatgggacatctgcc  
ttatacaggfattaagaaactactgcctttctctaatgcttctagttaa  
aaactgcagactfatgtaaagtagggctgatcgcctgccccattgt  
ctgtaactctgttttataattttgatgtgttctttctttttttt  
ttttttaagacagggtcctgctctgctactgaggctggagtgcagt  
gcgtgatcgcggctactgtagecctctgtcccagcctcttctgcct  
agcctcccaaatagctgggactacaggcacacgctaccatgcccggccaa  
ttttgtattttttagagatgaggtttaccatgtgccaggctgt  
aactcctgagctcaggtgatctgccactcggcctccaaagtctggg  
gttcacaggtgtgtttatttctatctaattattacacaaacacaatg  
tatttatattgtgtatctcttctgctacaatgtaattctatgagagt  
agtaatttctctgtctcaacactgttttcttaagtttggtacatagta  
ggcactcag**ATGCTT**aaaggaatgaatgaattgtcttaattccacttt  
TSS:TranscriptionalStartSite  
actaaacccaatctcccttggacattgtatctatgttttcaaga  
agtataatcataattgacagaaatccttgagaggcagaactaagtgagg

gattgggcagggttcagatgtaagaacagtaagctcagcagggtgtgat  
tgctcatgcctataaccctagcactctaggaggctgaggtgggatgattgctt  
gaggccaggagttgaaatcagcctgggcaacatagttagaccccat  
cactaccaacaaaataaataaataatgtacatgggtgcatatcccatagt  
cctagctactgggaggctatagtgaggagatagcttgatcagaagt  
ctgaggctgcagtgagctatgattgtggcactgcatgctagcctgggca  
atagagcaagaccctgtctctaaaltaacaaaaaaaaaagtactctagtt  
tctatgcaatgcattatctgctgtggatttagggcagtattatatac  
agataatttaggcatttgtaggcttaaatgaatgacaaaaagtacta  
aatcactgccatcacacggttatacagatgcaatgatgtattgattat  
agaggtttctactgttgctcatctatttttattgtttacatgtcttt  
tctatttttagtgccttaaaaggtgataatcactgctgagtgtg  
ttctcaacaatttaatttcag**GAGCCTACAAGAAAGTAC**  
GAGATTTA First Exon  
GTCAACTTGTGGAAGAGCTATTGAAAATCAT  
TTGTGCTTTTCAGCTTGA  
CACAGGTTTGGAGTgtaagtgtgaatccaagaat  
gacactcaag





## SUPPLEMENTAL INFO\_1

### The random amplified polymorphic DNA (RAPD) assay

The RAPD technique (Random Amplification of Polymorphic DNA) originally described by Williams et al., (1990) is used to assess also small changes in the genomic template during the proliferation of the tumor cells carrying mutant p53 proteins. Every nucleotide variation (insertions, deletions, DSBs, translocations, missense mutations) between different sets of template DNAs will result in the presence or absence of bands due to changes in the priming sites. The random amplified polymorphic DNA (RAPD) assay has been shown to detect genotoxin-induced DNA damage and mutations. The changes occurring in RAPD profiles include variation in band intensity as well as gain or loss of bands. It is a type of PCR reaction, but the segments of DNA that are amplified are random.

The scientist performing RAPD creates several arbitrary, short primers (8–12 nucleotides), then proceeds with the PCR using a large template of genomic DNA, the primers are able to differentiate between genetically distinct individuals or cell populations, although not necessarily in a reproducible way. No knowledge of the DNA sequence for the targeted genome is required, as the primers will bind somewhere in the sequence, but it is not certain exactly where. If two template genomic DNA

sequences are different, the PCR products display different banding patterns.

In the field of cancer research, the RAPD assay and related techniques allow the simultaneous detection and cloning of genomic alterations, without previous knowledge of the altered region. The RAPD is very likely to detect genomic instability, because the cancerous cell will produce a clone of dividing daughter cells. The first studies using the RAPD assay for the detection of genomic instability in brain and lung cancer were performed by Dil-Afroze et al. [Dil-Afroze et al., *Gene* 1998] and Ong et al. [Ong et al., *Carcinogenesis* 1998], respectively. The detected alterations in brain tumor DNA included the loss of a normal band, appearance of a new band and amplification of a pre-existing band. More recently, the RAPD assay was used to assess the overall genomic instability in liver cancers in transgenic mice hepatocellular carcinoma and oral squamous cell carcinomas. In other studies, it has shown the ability of RAPD to detect DNA sequences representing genetic alterations in stilbene estrogen-induced cancer cells, skin cancers, colorectal tumors, head and neck squamous cell carcinoma, mouse hepatoma cells MH-22a, breast and Wilm's human cancer tissues (Atienzar and Awadhesh, *Mutation Research*, 2006. Review).

However, the RAPD is a semi-quantitative method and the nature and amount of DNA effects can only be fully elucidated if changes occurring in RAPD profiles are specifically analysed (e.g. cloning, sequencing, probing).
